# Supplementary material for: Diminished Neural Processing of Aversive and Rewarding Stimuli During Selective Serotonin Reuptake Inhibitor Treatment
Source: PubMed Central journal article supplement (PMC2828549; doi:10.1016/j.biopsych.2009.11.001), 2010-03-01
Supplement: mmc1.pdf [file mmc1.pdf]

## Supplemental Information

**Table S1. Stimuli**

|                        |                                                           |                                                                                                                                                                             |
|------------------------|-----------------------------------------------------------|-----------------------------------------------------------------------------------------------------------------------------------------------------------------------------|
| <b>Condition 1</b>     | chocolate in the mouth + gray visual stimulus             |       |
| <b>Condition 2</b>     | picture of chocolate                                      |                                                                                          |
| <b>Condition 3</b>     | chocolate in the mouth + a picture of chocolate           |       |
| <b>Condition 4</b>     | strawberry in the mouth + gray visual stimulus            |     |
| <b>Condition 5</b>     | picture of moldy strawberries                             |                                                                                        |
| <b>Condition 6</b>     | strawberry in the mouth + a picture of moldy strawberries |   |
| <b>Rinse condition</b> | tasteless rinse control solution + gray visual stimulus   |                                                                                                                                                                             |

Notes: The term 'chocolate in the mouth' refers to the intra-oral delivery through a teflon tube of 0.5 ml of a fine liquid chocolate, which was identical for all such trials, and which could not be seen by the subject. The term 'strawberry in the mouth' refers to the intra-oral delivery of 0.5 ml of an unpleasant strawberry flavored drink through a tube that also could not be seen by the subject. The term 'picture of chocolate' refers to a picture of a bar of brown (i.e., milk chocolate) shown on the display screen, and the term 'picture of moldy strawberries' to a picture of moldy strawberries.

**TABLE S2.** Subjective state ratings before and after 7 days of treatment with citalopram, reboxetine or placebo. There were no significant effects of treatment group on any of the measures.

| Measure              | Citalopram<br>( <i>n</i> =15) |             | Reboxetine<br>( <i>n</i> =15) |             | Placebo<br>( <i>n</i> =15) |             |
|----------------------|-------------------------------|-------------|-------------------------------|-------------|----------------------------|-------------|
|                      | Mean (SD)                     |             | Mean (SD)                     |             | Mean (SD)                  |             |
|                      | Pre-treat                     | Post-treat  | Pre-treat                     | Post-treat  | Pre-treat                  | Post-treat  |
| <b>Alertness</b>     | 65.8 (12.2)                   | 54.6 (26)   | 71.6 (12.5)                   | 58.6 (22)   | 63.8 (18)                  | 57.5 (28)   |
| <b>Disgust</b>       | 12.3 (14.4)                   | 9.8 (16.9)  | 8.1(6.5)                      | 14.3 (27.5) | 5.58 (6.4)                 | 6.1 (7.2)   |
| <b>Drowsiness</b>    | 29.6 (23)                     | 9 (6.4)     | 27.3 (21.4)                   | 27 (34)     | 27.4(20)                   | 16.8 (15.5) |
| <b>Anxiety</b>       | 11.8 (7.2)                    | 15.5 (16)   | 13.7 (12.6)                   | 16.3 (24.6) | 14.2 (22)                  | 7.8 (8.8)   |
| <b>Happiness</b>     | 7.8 (7.3)                     | 12.7 (9.5)  | 4.9 (9.3)                     | 15.6 (28.6) | 3.6 (2.9)                  | 4.5 (5.4)   |
| <b>Nausea</b>        | 71 (13.7)                     | 60 (19)     | 76.3 (14)                     | 66.8 (14)   | 77.4 (13)                  | 72.8 (12.6) |
| <b>Sadness</b>       | 12.5 (14.3)                   | 9.9 (13.2)  | 8.4 (9.24)                    | 12.5 (18.8) | 7 (5.8)                    | 6.8 (6)     |
| <b>State Anxiety</b> | 32.5 (6.7)                    | 36.3 (10.2) | 32.4 (10.6)                   | 34.6 (13.5) | 31 (8.5)                   | 27.7 (6.6)  |

SD, standard deviation; Repeated measures ANOVAs all  $p > 0.1$

**TABLE S3.** Regions showing main effect of task irrespective of treatment for all subjects.

| Brain Region                       | Montreal Neurological<br>Institute (MNI)<br>Coordinates |    |     | Z-score | Significance<br>( <i>p</i> -value) |
|------------------------------------|---------------------------------------------------------|----|-----|---------|------------------------------------|
|                                    | X                                                       | Y  | Z   |         |                                    |
| <b>Chocolate in the mouth</b>      |                                                         |    |     |         |                                    |
| Ventral striatum                   | -10                                                     | 14 | -4  | 6.33    | <0.001                             |
| Anterior insula                    | -34                                                     | 16 | 0   | 6.63    | <0.001                             |
| Mid OFC                            | 22                                                      | 36 | -14 | 4.67    | 0.007                              |
| Pregenual cingulate                | -4                                                      | 20 | 44  | 5.88    | <0.001                             |
| Frontal pole                       | -38                                                     | 46 | 12  | 5.57    | <0.001                             |
| <b>Sight of chocolate</b>          |                                                         |    |     |         |                                    |
| Caudate                            | -10                                                     | 12 | 0   | 6.01    | <0.001                             |
| Anterior insula                    | -32                                                     | 12 | 2   | 7.1     | <0.001                             |
|                                    | 34                                                      | 24 | 2   | 6.24    | <0.001                             |
| Middle OFC                         | 26                                                      | 34 | -12 | 5.68    | <0.001                             |
| Frontal pole                       | -36                                                     | 50 | 24  | 6.16    | <0.001                             |
| <b>Strawberry in the mouth</b>     |                                                         |    |     |         |                                    |
| Lateral OFC/Insula                 | 34                                                      | 24 | -4  | 7.4     | <0.001                             |
| Caudate                            | 10                                                      | 14 | 0   | 6.06    | <0.001                             |
| Ventral striatum                   | 10                                                      | 12 | -6  | 6.06    | <0.001                             |
| Pregenual cingulate                | 4                                                       | 20 | 42  | 7.11    | <0.001                             |
| <b>Sight of moldy strawberries</b> |                                                         |    |     |         |                                    |
| Insula                             | -32                                                     | 18 | 6   | 6.93    | <0.001                             |
|                                    | 40                                                      | 20 | -2  | 6.72    | <0.001                             |
| Superior frontal gyrus             | 2                                                       | 20 | 60  | 5.75    | <0.001                             |

OFC, orbitofrontal cortex; *p*-values clusters whole brain fully corrected (FWE)

**Table S4.** Subjective ratings of pleasantness, intensity and wanting for each of the 6 conditions taken during the scanning session for citalopram, reboxetine and placebo groups

| <b>PLEASANTNESS</b>   |            |            |         |                        |            |            |         |  |
|-----------------------|------------|------------|---------|------------------------|------------|------------|---------|--|
|                       | Citalopram | Reboxetine | Placebo |                        | Citalopram | Reboxetine | Placebo |  |
| <b>CHOC<br/>TASTE</b> | 1.04       | 1.10       | 1.14    | <b>STRAW<br/>TASTE</b> | -0.93      | -0.68      | -0.94   |  |
| STDEV                 | 0.54       | 0.41       | 0.32    | STDEV                  | 0.81       | -0.68      | 0.60    |  |
| SEM                   | 0.14       | 0.10       | 0.08    | SEM                    | 0.21       | 0.26       | 0.15    |  |
| <b>CHOC<br/>PIC</b>   | 0.97       | 1.07       | 1.13    | <b>STRAW<br/>PIC</b>   | -1.16      | -1.13      | -1.06   |  |
| STDEV                 | 0.58       | 0.57       | 0.32    | STDEV                  | 0.48       | -1.13      | 0.42    |  |
| SEM                   | 0.15       | 0.15       | 0.08    | SEM                    | 0.12       | 0.14       | 0.11    |  |
| <b>CHOC<br/>BOTH</b>  | 1.23       | 1.35       | 1.28    | <b>STRAW<br/>BOTH</b>  | -1.21      | -1.19      | -1.37   |  |
| STDEV                 | 0.51       | 0.50       | 0.37    | STDEV                  | 0.62       | -1.19      | 0.33    |  |
| SEM                   | 0.13       | 0.13       | 0.10    | SEM                    | 0.16       | 0.17       | 0.09    |  |
| <b>INTENSITY</b>      |            |            |         |                        |            |            |         |  |
|                       | Citalopram | Reboxetine | Placebo |                        | Citalopram | Reboxetine | Placebo |  |
| <b>CHOC<br/>TASTE</b> | 1.77       | 1.80       | 2.00    | <b>STRAW<br/>TASTE</b> | 2.07       | 1.99       | 2.05    |  |
| STDEV                 | 0.66       | 0.71       | 0.73    | STDEV                  | 0.72       | 0.71       | 0.74    |  |
| SEM                   | 0.17       | 0.18       | 0.19    | SEM                    | 0.19       | 0.18       | 0.19    |  |
| <b>CHOC<br/>PIC</b>   | 1.57       | 0.61       | 1.29    | <b>STRAW<br/>PIC</b>   | 1.71       | 1.78       | 1.43    |  |
| STDEV                 | 0.72       | 0.81       | 0.61    | STDEV                  | 0.86       | 0.92       | 0.71    |  |
| SEM                   | 0.19       | 0.21       | 0.16    | SEM                    | 0.22       | 0.24       | 0.18    |  |
| <b>CHOC<br/>BOTH</b>  | 2.15       | 2.25       | 2.24    | <b>STRAW<br/>BOTH</b>  | 2.31       | 2.38       | 2.57    |  |
| STDEV                 | 0.75       | 0.89       | 0.78    | STDEV                  | 0.79       | 0.91       | 0.69    |  |
| SEM                   | 0.19       | 0.23       | 0.20    | SEM                    | 0.20       | 0.24       | 0.18    |  |
| <b>WANTING</b>        |            |            |         |                        |            |            |         |  |
|                       | Citalopram | Reboxetine | Placebo |                        | Citalopram | Reboxetine | Placebo |  |
| <b>CHOC<br/>TASTE</b> | 0.98       | 0.96       | 1.01    | <b>STRAW<br/>TASTE</b> | -1.05      | -0.87      | -1.11   |  |
| STDEV                 | 0.55       | 0.52       | 0.43    | STDEV                  | 0.82       | 0.93       | 0.50    |  |
| SEM                   | 0.14       | 0.13       | 0.11    | SEM                    | 0.21       | 0.24       | 0.13    |  |
| <b>CHOC<br/>PIC</b>   | 0.98       | 0.94       | 1.08    | <b>STRAW<br/>PIC</b>   | -1.24      | -1.23      | -1.15   |  |
| STDEV                 | 0.58       | 0.69       | 0.41    | STDEV                  | 0.45       | 0.59       | 0.47    |  |
| SEM                   | 0.15       | 0.18       | 0.10    | SEM                    | 0.12       | 0.15       | 0.12    |  |
| <b>CHOC<br/>BOTH</b>  | 1.14       | 1.22       | 1.13    | <b>STRAW<br/>BOTH</b>  | -1.29      | -1.32      | -1.44   |  |
| STDEV                 | 0.56       | 0.61       | 0.52    | STDEV                  | 0.48       | 0.57       | 0.31    |  |
| SEM                   | 0.14       | 0.16       | 0.13    | SEM                    | 0.13       | 0.15       | 0.08    |  |

Choc, chocolate; straw, strawberry; STDEV, standard deviation; SEM, standard error of the mean
